# Supplementary material
Source: ML conference proceedings conference paper supplement (https://proceedings.mlr.press/v119/liu20k.html)
Supplement: Supplementary file 1 [file liu20k-supp.pdf]

---

# Supplementary Material for “Median Matrix Completion: from Embarrassment to Optimality”

---

Weidong Liu<sup>1</sup> Xiaojun Mao<sup>2</sup> Raymond K. W. Wong<sup>3</sup>

## A. Proofs

*Proof of Theorem 1.* As for the (i) in Theorem 1, we obtain the upper bound directly from Theorem 4.6 of Alquier et al. (2019).

As for (ii), by putting these  $n_1 n_2 / (m_1 m_2)$  estimators  $\widehat{\mathbf{A}}_{\text{QMC},l}$  together, we focus on both the first and second term of the right hand side of the upper bound (3.1) respectively. It is easy to verify that the upper bound in the right hand side hold.

In terms of the probability, we can conclude that

$$\sum_{l=1}^{l_1 l_2} C_l \exp(-C_l s_l m_{\max} \log(m_+)) \leq \max\{C_l\} \exp(\log(n_1 n_2) - \min\{C_l\} m_{\max} \log(m_+)).$$

□

**Proposition A.1.** *Suppose that Conditions (C1)-(C5) hold. Let  $h \geq c \log(n_+)/N$  for some  $c > 0$  and  $h = O((n_1 n_2)^{-1/2} a_N)$ . We have*

$$|\widehat{f}(0) - f(0)| = O_P \left( \sqrt{\frac{\log(n_+)}{Nh}} + \frac{a_N}{\sqrt{n_1 n_2}} \right).$$

*Proof of Proposition A.1.* Let

$$D_{N,h}(\mathbf{A}) = \frac{1}{Nh} \sum_{i=1}^N K \left( \frac{Y_i - \text{tr}(\mathbf{X}_i^T \mathbf{A})}{h} \right).$$

To prove the proposition, without loss of generality, we can assume that  $\|\mathbf{A} - \mathbf{A}_*\|_F \leq a_N$ . It follows that  $\widehat{f}(0) =$

<sup>\*</sup>Equal contribution <sup>1</sup>School of Mathematical Sciences and MoE Key Lab of Artificial Intelligence Shanghai Jiao Tong University, Shanghai, 200240, China <sup>2</sup>School of Data Science, Fudan University, Shanghai, 200433, China <sup>3</sup>Department of Statistics, Texas A&M University, College Station, TX 77843, U.S.A.. Correspondence to: Xiaojun Mao <maojx@fudan.edu.cn>.

$D_{N,h}(\mathbf{A})$  and

$$\left| \widehat{f}(0) - f(0) \right| \leq \sup_{\|\mathbf{A} - \mathbf{A}_*\|_F \leq a_N} |D_{N,h}(\mathbf{A}) - f(0)|.$$

We denote  $\mathbf{A}_* = (A_{*,11}, \dots, A_{*,n_1 n_2})$ . For every  $s$  and  $t$ , we divide the interval  $[A_{*,st} - a_N, A_{*,st} + a_N]$  into  $(n_1 n_2)^M$  small sub-intervals and each has length  $2a_N / (n_1 n_2)^M$ , where  $M$  is a large positive number. Therefore, there exists a set of matrices in  $\mathbb{R}^{n_1 \times n_2}$ ,  $\{\mathbf{A}_{(k)}, 1 \leq k \leq s_N\}$  with  $s_N \leq (n_1 n_2)^{M(n_1 n_2)}$  and  $\|\mathbf{A}_{(k)} - \mathbf{A}_*\|_F \leq a_N$ , such that for any  $\mathbf{A}$  in the ball  $\{\mathcal{A} : \mathbf{A} \in \mathbb{R}^{n_1 \times n_2}, \|\mathbf{A} - \mathbf{A}_*\|_F \leq a_N\}$ , we have  $\|\mathbf{A} - \mathbf{A}_{(k)}\|_F \leq 2\sqrt{n_1 n_2} a_N / (n_1 n_2)^M$  for some  $1 \leq k \leq s_N$ . Therefore

$$\left| \frac{1}{h} K \left( \frac{Y_i - \text{tr}(\mathbf{X}_i^T \mathbf{A})}{h} \right) - \frac{1}{h} K \left( \frac{Y_i - \text{tr}(\mathbf{X}_i^T \mathbf{A}_{(k)})}{h} \right) \right| \leq Ch^{-2} |\text{tr}\{\mathbf{X}_i^T (\mathbf{A} - \mathbf{A}_{(k)})\}|.$$

This yields that

$$\sup_{\|\mathbf{A} - \mathbf{A}_*\|_F \leq a_N} |D_{N,h}(\mathbf{A}) - f(0)| - \sup_{1 \leq k \leq s_N} |D_{N,h}(\mathbf{A}_{(k)}) - f(0)| \leq \frac{CN\sqrt{n_1 n_2} a_N}{(n_1 n_2)^{M+1} h^2}.$$

By letting  $M$  large enough, we have

$$\sup_{\|\mathbf{A} - \mathbf{A}_*\|_2 \leq a_N} |D_{N,h}(\mathbf{A}) - f(0)| - \sup_{1 \leq k \leq s_N} |D_{N,h}(\mathbf{A}_{(k)}) - f(0)| = O_P(n_+^{-\gamma}).$$

It is enough to show that  $\sup_k |D_{N,h}(\mathbf{A}_{(k)}) - \mathbb{E}D_{N,h}(\mathbf{A}_{(k)})|$  and  $\sup_k |\mathbb{E}D_{N,h}(\mathbf{A}_{(k)}) - f(0)|$  satisfy the bound in the lemma. Let  $\mathbb{E}_*(\cdot)$  denote the conditional expectation given  $\{\mathbf{X}_k\}$ . We have

$$\begin{aligned} & \mathbb{E}_* \left\{ \frac{1}{h} K \left( \frac{\epsilon_i - \text{tr}\{\mathbf{X}_i^T (\mathbf{A} - \mathbf{A}_*)\}}{h} \right) \right\} = \\ & \int_{-\infty}^{\infty} K(x) f \{hx + \text{tr}\{\mathbf{X}_i^T (\mathbf{A} - \mathbf{A}_*)\}\} dx \\ & = f(0) + O(h + |\text{tr}\{\mathbf{X}_i^T (\mathbf{A} - \mathbf{A}_*)\}|). \end{aligned}$$

Under Condition (C1), with the fact that  $\mathbb{E}|\text{tr}\{\mathbf{X}_i^T(\mathbf{A} - \mathbf{A}_*)\}| \leq (n_1 n_2)^{-1} a_N$  and  $\text{Var}|\text{tr}\{\mathbf{X}_i^T(\mathbf{A} - \mathbf{A}_*)\}| \leq (n_1 n_2)^{-1} a_N^2$ , we have

$$\begin{aligned} & |\mathbb{E}D_{N,h}(\mathbf{A}_{(k)}) - f(0)| \leq \\ & C \left( h + (n_1 n_2)^{-1/2} \|\mathbf{A}_{(k)} - \mathbf{A}_*\|_F \right) \\ & = O(h + (n_1 n_2)^{-1/2} a_N). \end{aligned}$$

It remains to bound  $\sup_k |D_{N,h}(\mathbf{A}_{(k)}) - \mathbb{E}D_{N,h}(\mathbf{A}_{(k)})|$ . Put

$$\xi_{i,k} = K \left( \frac{\epsilon_i - \text{tr}\{\mathbf{X}_i^T(\mathbf{A}_{(k)} - \mathbf{A}_*)\}}{h} \right).$$

We have

$$h \int_{-\infty}^{\infty} \{K(x)\}^2 f\{hx + \text{tr}\{\mathbf{X}_i^T(\mathbf{A}_{(k)} - \mathbf{A}_*)\}\} dx \leq Ch. \quad \mathbb{E}_* \xi_{i,k}^2 =$$

Since  $K(x)$  is bounded, we have by the exponential inequality (Lemma 1 in (Cai & Liu, 2011)) and the fact that  $\log(n_+) = O(Nh)$ , we have for any  $\gamma > 0$ , there exists a constant  $C > 0$  such that

$$\begin{aligned} \sup_k \mathbb{P} \left( \left| \sum_{i=1}^N (\xi_{i,k} - \mathbb{E}\xi_{i,k}) \right| \geq C\sqrt{Nh \log(n_+)} \right) \\ = O(n_+^{-\gamma}). \end{aligned}$$

By letting  $\gamma > M$ , we can obtain that

$$\begin{aligned} \sup_k |D_{N,h}(\mathbf{A}_{(k)}) - \mathbb{E}D_{N,h}(\mathbf{A}_{(k)})| = \\ O_P \left( \sqrt{\frac{\log(n_+)}{Nh}} \right). \end{aligned}$$

This completes the proof.  $\square$

**Lemma A.1.** *We have for any  $\gamma > 0$ ,  $\|\mathbf{u}\|_2 = 1$  and  $\|\mathbf{v}\|_2 = 1$ , there exists a constant  $C > 0$  such that*

$$\begin{aligned} \Pr \left( \frac{1}{N} \sum_{i=1}^N (|\mathbf{v}^T \mathbf{X}_i \mathbf{u}| - \mathbb{E}|\mathbf{v}^T \mathbf{X}_i \mathbf{u}|) \geq C\sqrt{\frac{\log(n_+)}{n_{\min} N}} \right) \\ = O(n_+^{-\gamma}). \end{aligned}$$

*Proof of Lemma A.1.* On one hand, we have  $\mathbb{E}|\mathbf{v}^T \mathbf{X}_i \mathbf{u}| = O(n_{\min}^{-1})$ . On the other hand, to apply Lemma 1 in Cai & Liu (2011), we only need to find  $B_N$  so that  $\sum_i^N \mathbb{E}(|\mathbf{v}^T \mathbf{X}_i \mathbf{u}|^2 \exp \eta |\mathbf{v}^T \mathbf{X}_i \mathbf{u}|) \leq B_N^2$ . For each  $i =$

$1, \dots, N$ , we have

$$\begin{aligned} & \mathbb{E}(|\mathbf{v}^T \mathbf{X}_i \mathbf{u}|^2 \exp(\eta |\mathbf{v}^T \mathbf{X}_i \mathbf{u}|)) \\ & \leq \frac{\bar{c}}{n_1 n_2} \sum_{s=1}^{n_1} \sum_{t=1}^{n_2} u_s^2 v_t^2 \exp(\eta |u_s v_t|) \\ & \leq \frac{\bar{c}}{n_1 n_2} \sum_{s=1}^{n_1} \sum_{t=1}^{n_2} u_s^2 v_t^2 \exp(\eta u_s^2) \exp(\eta v_t^2) \\ & \leq \frac{C(n_1 + n_2)}{n_1 n_2} = \frac{C}{n_{\min}}. \end{aligned}$$

Take  $x^2 = \gamma \log(n_+)$  and  $B_N^2 = C\gamma^{-1} N n_{\min}^{-1}$  in Lemma 1 of Cai & Liu (2011), we can get the conclusion.  $\square$

Denote  $\mathbf{B}_N(\mathbf{A}) \in \mathbb{R}^{n_1 \times n_2}$  where

$$\begin{aligned} B_N(\mathbf{A}) = \frac{1}{N} \sum_{i=1}^N [\mathbf{X}_i \mathbb{I}[\epsilon_i \leq \text{tr}\{\mathbf{X}_i^T(\mathbf{A} - \mathbf{A}_*)\}] \\ - \mathbf{X}_i f(\text{tr}\{\mathbf{X}_i^T(\mathbf{A} - \mathbf{A}_*)\})] \\ - \frac{1}{N} \sum_{i=1}^N [\mathbf{X}_i \mathbb{I}[\epsilon_i \leq 0] - \mathbf{X}_i f(0)]. \quad (\text{A.1}) \end{aligned}$$

Let  $\Theta = \{\mathbf{A} : \|\mathbf{A} - \mathbf{A}_*\|_F \leq c\}$  for some  $c > 0$ .

**Lemma A.2.** *We have for any  $\gamma > 0$ , there exists a constant  $C > 0$  such that*

$$\begin{aligned} \sup_{\|\mathbf{v}\|_2=1} \sup_{\|\mathbf{u}\|_2=1} \Pr \left( \sup_{\mathbf{A} \in \Theta} \frac{\sqrt{n_1 n_2} |\mathbf{v}^T B_N(\mathbf{A}) \mathbf{u}|}{\sqrt{\|\mathbf{A} - \mathbf{A}_*\|_F + n_{\max} \log(n_+)/N}} \geq \right. \\ \left. C\sqrt{\frac{\log(n_+)}{n_{\min} N}} \right) = O(n_+^{-\gamma}). \end{aligned}$$

*Proof of Lemma A.2.* We define  $\mathbb{R}^{n_1 \times n_2}$ ,  $\{\mathbf{A}_{(k)}, 1 \leq k \leq s_N\}$  as in the proof of Proposition A.1 with by replacing  $a_N$  with  $c$ . Then for any  $\mathbf{A} \in \Theta$ , there exists  $\mathbf{A}_{(k)}$  with  $\|\mathbf{A} - \mathbf{A}_{(k)}\|_F \leq 2c\sqrt{n_1 n_2}/(n_1 n_2)^M$  and we have

$$\begin{aligned} & \left| \frac{\sqrt{n_1 n_2} |\mathbf{v}^T B_N(\mathbf{A}) \mathbf{u}|}{\sqrt{\|\mathbf{A} - \mathbf{A}_*\|_F + n_{\max} \log(n_+)/N}} - \right. \\ & \left. \frac{\sqrt{n_1 n_2} |\mathbf{v}^T B_N(\mathbf{A}_{(k)}) \mathbf{u}|}{\sqrt{\|\mathbf{A}_{(k)} - \mathbf{A}_*\|_F + n_{\max} \log(n_+)/N}} \right| \\ & \leq \left| \frac{\sqrt{n_1 n_2} |\mathbf{v}^T B_N(\mathbf{A}_{(k)}) \mathbf{u}|}{\sqrt{\|\mathbf{A} - \mathbf{A}_*\|_F + n_{\max} \log(n_+)/N}} - \right. \\ & \left. \frac{\sqrt{n_1 n_2} |\mathbf{v}^T B_N(\mathbf{A}_{(k)}) \mathbf{u}|}{\sqrt{\|\mathbf{A}_{(k)} - \mathbf{A}_*\|_F + n_{\max} \log(n_+)/N}} \right| \\ & \quad + \frac{\sqrt{n_1 n_2} |\mathbf{v}^T B_N(\mathbf{A}) \mathbf{u} - \mathbf{v}^T B_N(\mathbf{A}_{(k)}) \mathbf{u}|}{\sqrt{\|\mathbf{A} - \mathbf{A}_*\|_F + n_{\max} \log(n_+)/N}} \\ & =: I_1 + I_2. \end{aligned}$$

It is easy to see that

$$|I_1| \leq C \frac{\sum_{i=1}^N |\mathbf{v}^T \mathbf{X}_i \mathbf{u}| \text{tr}\{\mathbf{X}_i^T (\mathbf{A}_{(k)} - \mathbf{A}_*)\}}{N} \times \frac{\sqrt{n_1 n_2} \times c \sqrt{n_1 n_2}}{(n_1 n_2)^M (c + n_{\max} \log(n_+)/N)^{3/2}} =: I_3.$$

With Lemma A.1, we can show that

$$\Pr \left( I_3 \geq C \sqrt{\frac{\log(n_+)}{n_{\min} N}} \right) = O(n_+^{-\gamma}),$$

for any  $\gamma > 0$  by letting  $M$  be sufficiently large. For  $I_2$ , noting that

$$\left| f(\text{tr}\{\mathbf{X}_i^T (\mathbf{A} - \mathbf{A}_*)\}) - f(\text{tr}\{\mathbf{X}_i^T (\mathbf{A}_{(k)} - \mathbf{A}_*)\}) \right| \leq C \sqrt{n_1 n_2} / (n_1 n_2)^M,$$

we have

$$\begin{aligned} |I_2| &\leq \sqrt{n_1 n_2} \left( \frac{c n_{\max} \log(n_+)}{N} \right)^{-1/4} \frac{1}{N} \sum_{i=1}^N |\mathbf{v}^T \mathbf{X}_i \mathbf{u}| \times \\ &\mathbb{I} \left[ |\epsilon_i - \text{tr}\{\mathbf{X}_i^T (\mathbf{A}_{(k)} - \mathbf{A}_*)\}| \leq 2c \sqrt{n_1 n_2} / (n_1 n_2)^M \right] \\ &+ C \frac{c n_1 n_2}{(n_1 n_2)^M} \left( \frac{c n_{\max} \log(n_+)}{N} \right)^{-1/4} \times \\ &\frac{1}{N} \sum_{i=1}^N |\mathbf{v}^T \mathbf{X}_i \mathbf{u}| \\ &=: I_4 + I_5. \end{aligned}$$

It is easy to show that  $\mathbb{E}(I_4) = o(\sqrt{\log(n_+)}/(n_{\min} N))$  with  $M$  large enough and

$$\begin{aligned} \Pr \left( I_5 \geq C \sqrt{\frac{\log(n_+)}{n_{\min} N}} \right) &\leq \\ &\sum_{i=1}^N \Pr \left( |\mathbf{v}^T \mathbf{X}_i \mathbf{u}| \geq \frac{(n_1 n_2)^{M-2} N^{1/4}}{n_{\max} \log(n_+)} \right) \\ &= O(n_+^{-\gamma}), \end{aligned}$$

for any  $\gamma > 0$  by letting  $M$  be sufficiently large. Also for some  $\eta > 0$ ,

$$\begin{aligned} &\mathbb{E}(|\mathbf{v}^T \mathbf{X}_i \mathbf{u}|^2 \exp(\eta |\mathbf{v}^T \mathbf{X}_i \mathbf{u}|) \times \\ &\mathbb{I} \left[ |\epsilon_i - \text{tr}\{\mathbf{X}_i^T (\mathbf{A}_{(k)} - \mathbf{A}_*)\}| \leq 2c \sqrt{n_1 n_2} / (n_1 n_2)^M \right]) \\ &\leq C \sqrt{n_1 n_2} (n_1 n_2)^{-M} \mathbb{E} |\mathbf{v}^T \mathbf{X}_i \mathbf{u}|^2 \exp(\eta |\mathbf{v}^T \mathbf{X}_i \mathbf{u}|) \\ &= O(1 / ((n_1 n_2)^{M-1/2} n_{\min})). \end{aligned}$$

Now by the exponential inequality in (Cai & Liu, 2011) (taking  $x = \sqrt{\gamma \log(n_+)}$ ,  $B_n = \sqrt{\gamma^{-1} N \log(n_+)}/n_{\min}$  and noting that  $1 / ((n_1 n_2)^{M-1/2} n_{\min}) = o(B_N^2)$ ), we have for large  $C > 0$ ,

$$\begin{aligned} \Pr \left( |I_4 - \mathbb{E}(I_4)| \geq C \sqrt{\frac{\log(n_+)}{n_{\min} N}} \right) \\ = O(n_+^{-\gamma}). \end{aligned}$$

As  $s_N \leq (n_1 n_2)^{M(n_1 n_2)}$ , by choosing  $C$  sufficiently large such that  $\gamma > M$ , it is enough to show that for any  $\gamma > 0$ ,

$$\begin{aligned} &\sup_{|\mathbf{v}|_2=1} \sup_{|\mathbf{u}|_2=1} \max_k \Pr \left( \sqrt{n_1 n_2} |\mathbf{v}^T B_N(\mathbf{A}_{(k)}) \mathbf{u}| \times \right. \\ &\left. \frac{1}{\sqrt{\|\mathbf{A}_{(k)} - \mathbf{A}_*\|_F + n_{\max} \log(n_+)/N}} \geq C \sqrt{\frac{\log(n_+)}{n_{\min} N}} \right) \\ &= O(n_+^{-\gamma}). \end{aligned} \quad (\text{A.2})$$

Set

$$Z_i(\mathbf{A}) = \mathbb{I} [\epsilon_i \leq \text{tr}\{\mathbf{X}_i^T (\mathbf{A} - \mathbf{A}_*)\}] - f(\text{tr}\{\mathbf{X}_i^T (\mathbf{A} - \mathbf{A}_*)\}).$$

Then we have

$$\begin{aligned} &\mathbb{E}(\mathbf{v}^T \mathbf{X}_i \mathbf{u})^2 (Z_i(\mathbf{A}) - Z_i(\mathbf{A}_*))^2 \exp(\eta |\mathbf{v}^T \mathbf{X}_i \mathbf{u}|) \\ &\leq C (n_1 n_2)^{-1} \|\mathbf{A} - \mathbf{A}_*\|_F \times \\ &\sup_{|\mathbf{v}|_2=1, |\mathbf{u}|_2=1} \mathbb{E}(\mathbf{v}^T \mathbf{X}_i \mathbf{u})^2 \exp(\eta |\mathbf{v}^T \mathbf{X}_i \mathbf{u}|) \\ &\leq C (n_1 n_2)^{-1} \|\mathbf{A} - \mathbf{A}_*\|_F n_{\min}^{-1}. \end{aligned}$$

Now letting  $B_N^2 = C \gamma^{-1} (N \|\mathbf{A}_{(k)} - \mathbf{A}_*\|_F / (n_1 n_2) + N \log(n_+) / n_{\min})$  and  $x^2 = \gamma \log(n_+)$  in Lemma 1 in (Cai & Liu, 2011), we can show (A.2) holds.  $\square$

Let

$$U_N = \sup_{\|\mathbf{A} - \mathbf{A}_*\|_F \leq a_N} \|\mathbf{B}_N(\mathbf{A})\|.$$

For a unit ball  $B$  in  $R^s$ , we have the fact that there exist  $q_s$  balls with centers  $\mathbf{x}_1, \dots, \mathbf{x}_{q_s}$  and radius  $z$  (i.e.,  $B_i = \{\mathbf{x} \in R^s : |\mathbf{x} - \mathbf{x}_i| \leq z\}$ ,  $1 \leq i \leq q_s$ ) such that  $B \subseteq \cup_{i=1}^{q_s} B_i$  and  $q_s$  satisfies  $q_s \leq (1+2/z)^s$ . Then by a standard  $\mathcal{E}$ -net argument, for any matrix  $\mathbf{A} \in \mathbb{R}^{n_1 \times n_2}$ , there exist  $\mathbf{v}_1, \dots, \mathbf{v}_{b_1}$  and  $\mathbf{u}_1, \dots, \mathbf{u}_{b_2}$  (which do not depend on  $\mathbf{A}$ ) with  $|\mathbf{v}_i|_2 = 1$  and  $|\mathbf{u}_i|_2 = 1$ ,  $b_1 \leq 9^{n_1}$  and  $b_2 \leq 9^{n_2}$  such that

$$\|\mathbf{A}\| \leq 5 \max_{1 \leq i \leq b_1} \max_{1 \leq j \leq b_2} |\mathbf{v}_i^T \mathbf{A} \mathbf{u}_j|. \quad (\text{A.3})$$

So we have  $U_N \leq 5 \max_{1 \leq i \leq b_1} \max_{1 \leq j \leq b_2} |\mathbf{v}_i^T B_N(\mathbf{A}_{(k)}) \mathbf{u}_j|$ . Assume the initial value  $(n_1 n_2)^{-1/2} \|\mathbf{A}_* - \hat{\mathbf{A}}_0\|_F = o_P(1)$ . By Lemma A.2, we have

$$U_N = O_P \left( \sqrt{\frac{\|\hat{\mathbf{A}}_0 - \mathbf{A}_*\|_F \log(n_+)}{n_1 n_2 n_{\min} N}} + \frac{\log(n_+)}{n_{\min} N} \right).$$

So we have the following lemma.

**Lemma A.3.** Assume that Conditions (C1)-(C6) hold. We have

$$U_N = O_P \left( \sqrt{\frac{a_N \log(n_+)}{n_1 n_2 n_{\min} N}} + \frac{\log(n_+)}{n_{\min} N} \right).$$

To obtain Theorem 2 which related to the repeated refinements, we consider the following one-step refinement result at first.

**Theorem A.1** (One-step refinement). *Suppose that Conditions (C1)–(C5) hold and  $\mathbf{A}_\star \in \mathcal{B}(a, n_1, n_2)$ . By choosing the bandwidth  $h \asymp (n_1 n_2)^{-1/2} a_N$  and taking*

$$\lambda_N = C \left( \sqrt{\frac{\log(n_+)}{n_{\min} N}} + \frac{a_N^2}{n_{\min}(n_1 n_2)} \right),$$

where  $C$  is a sufficient large constant, we have

$$\begin{aligned} \frac{\|\widehat{\mathbf{A}}^{(1)} - \mathbf{A}_\star\|_F^2}{n_1 n_2} &= O_P \left[ \max \left\{ \sqrt{\frac{\log(n_+)}{N}}, \right. \right. \\ &\left. \left. r_\star \left( \frac{n_{\max} \log(n_+)}{N} + \frac{a_N^4}{n_{\min}^2(n_1 n_2)} \right) \right\} \right]. \quad (\text{A.4}) \end{aligned}$$

To obtain Theorems A.1 and 2, we require Lemmas A.4 and 1 respectively.

**Lemma A.4.** *Suppose that Conditions (C1)–(C5) hold and  $\mathbf{A}_\star \in \mathcal{B}(a, n_1, n_2)$ . By choosing the bandwidth  $h \asymp (n_1 n_2)^{-1/2} a_N$ , we have*

$$\left\| \frac{1}{N} \sum_{i=1}^N \xi_i^{(1)} \mathbf{X}_i \right\| = O_P \left( \sqrt{\frac{\log(n_+)}{n_{\min} N}} + \frac{a_N^2}{n_{\min}(n_1 n_2)} \right).$$

Lemma A.4 obtains the upper bound for the stochastic error term that appears in the first update iteration of the initial estimator  $\mathbf{A}_0$  fulfill condition (C5). It is easy to verify that our initial estimator  $\widehat{\mathbf{A}}_{\text{LADMC},0}$  proposed in section 2.2 satisfy condition (C5).

*Proof of Lemma A.4.* Denote  $\mathbf{H}_N(\mathbf{A}) \in \mathbb{R}^{n_1 \times n_2}$  where

$$\begin{aligned} H_N(\mathbf{A}) &= \\ \frac{\widehat{f}^{-1}(0)}{N} \sum_{i=1}^N \mathbf{X}_i \{ &f[\text{tr}\{\mathbf{X}_i^T(\mathbf{A} - \mathbf{A}_\star)\}] - f(0) \} \\ &+ \frac{1}{N} \sum_{i=1}^N \mathbf{X}_i \text{tr} \{ \mathbf{X}_i^T(\mathbf{A} - \mathbf{A}_\star) \}. \end{aligned}$$

We have

$$\begin{aligned} &\left\| \frac{1}{N} \sum_{i=1}^N \xi_i^{(1)} \mathbf{X}_i \right\| \leq \\ &\left\| -\frac{\widehat{f}^{-1}(0)}{N} \sum_{i=1}^N \mathbf{X}_i \left( \mathbb{I}[Y_i \leq \text{tr}\{\mathbf{X}_i^T \widehat{\mathbf{A}}_0\}] - \tau \right) \right. \\ &\quad \left. + \frac{1}{N} \sum_{i=1}^N \mathbf{X}_i \text{tr} \{ \mathbf{X}_i^T (\widehat{\mathbf{A}}_0 - \mathbf{A}_\star) \} \right\| \leq \\ &\|\mathbf{H}_N(\widehat{\mathbf{A}}_0)\| + |\widehat{f}^{-1}(0)| \left\| \frac{1}{N} \sum_{i=1}^N [\mathbf{X}_i \mathbb{I}[\epsilon_i \leq 0] - \mathbf{X}_i f(0)] \right\| \\ &\quad + |\widehat{f}^{-1}(0)| U_N. \end{aligned}$$

By Proposition A.1 and  $(n_1 n_2)^{1/2} \log(n_+) = o(N a_N)$ , we have  $\widehat{f}(0) \geq c$  for some  $c > 0$  with probability tending to one. Therefore, for the last term, by Lemma A.3, we have

$$|\widehat{f}^{-1}(0)| U_N = O_P \left( \sqrt{\frac{a_N \log(n_+)}{n_1 n_2 n_{\min} N}} + \frac{\log(n_+)}{n_{\min} N} \right).$$

For the second term of the right hand side, by (A.3) and the exponential inequality in (Cai & Liu, 2011), follow the same proof with Lemma A.1, we have

$$|\widehat{f}^{-1}(0)| \left\| \frac{1}{N} \sum_{i=1}^N \mathbf{X}_i [\mathbb{I}[\epsilon_i \leq 0] - f(0)] \right\| = O_P \left( \sqrt{\frac{\log(n_+)}{n_{\min} N}} \right).$$

By second order Taylor expansion, under condition (C1) we have,

$$\begin{aligned} &\frac{\widehat{f}^{-1}(0)}{N} \sum_{i=1}^N \mathbf{v}^T \mathbf{X}_i \mathbf{u} \left[ f(\text{tr}\{\mathbf{X}_i^T(\mathbf{A}_\star - \widehat{\mathbf{A}}_0)\}) - f(0) \right] \\ &= \frac{\widehat{f}^{-1}(0) f(0)}{N} \sum_{i=1}^N \mathbf{v}^T \mathbf{X}_i \mathbf{u} \text{tr} \{ \mathbf{X}_i^T (\mathbf{A}_\star - \widehat{\mathbf{A}}_0) \} \\ &\quad + O(1) \frac{\widehat{f}^{-1}(0)}{N} \sum_{i=1}^N |\mathbf{v}^T \mathbf{X}_i \mathbf{u}| \left[ \text{tr} \{ \mathbf{X}_i^T (\mathbf{A}_\star - \widehat{\mathbf{A}}_0) \} \right]^2. \end{aligned}$$

Let  $\mathbf{v}_1, \dots, \mathbf{v}_{b_1}$  and  $\mathbf{u}_1, \dots, \mathbf{u}_{b_2}$  be defined as in the argument

above Lemma A.3. Together with Lemma A.1, we have

$$\begin{aligned} & \left| \mathbf{v}_k^T \mathbf{H}_N \left( \widehat{\mathbf{A}}_0 \right) \mathbf{u}_j \right| \leq \left| \widehat{f}^{-1}(0) f(0) - 1 \right| \times \\ & \left| \frac{1}{N} \sum_{i=1}^N \mathbf{v}_k^T \mathbf{X}_i \mathbf{u}_j \operatorname{tr} \left\{ \mathbf{X}_i^T \left( \mathbf{A}_* - \widehat{\mathbf{A}}_0 \right) \right\} \right| \\ & + C \widehat{f}^{-1}(0) \frac{1}{N} \sum_{i=1}^N \left| \mathbf{v}_k^T \mathbf{X}_i \mathbf{u}_j \right| \left[ \operatorname{tr} \left\{ \mathbf{X}_i^T \left( \mathbf{A}_* - \widehat{\mathbf{A}}_0 \right) \right\} \right]^2 \\ & \leq C \left( \sqrt{\frac{\log(n_+)}{Nh}} + \frac{a_N}{\sqrt{n_1 n_2}} \right) \frac{\left\| \mathbf{A}_* - \widehat{\mathbf{A}}_0 \right\|_F}{n_{\min} \sqrt{n_1 n_2}} \\ & \quad + C \frac{1}{n_{\min}(n_1 n_2)} \left\| \mathbf{A}_* - \widehat{\mathbf{A}}_0 \right\|_F^2 \end{aligned}$$

We can easily have

$$\begin{aligned} \left\| \frac{1}{N} \sum_{i=1}^N \xi_i^{(1)} \mathbf{X}_i \right\| &= O_P \left( \sqrt{\frac{\log(n_+)}{n_{\min} N}} + \sqrt{\frac{a_N \log(n_+)}{n_1 n_2 n_{\min} N}} \right. \\ & \quad \left. + a_N \sqrt{\frac{\log(n_+)}{n_{\min}^2 n_1 n_2 N h}} + \frac{a_N^2}{n_{\min}(n_1 n_2)} \right). \end{aligned}$$

The lemma is proved.  $\square$

Define the observation operator  $\Omega : \mathbb{R}^{n_1 \times n_2} \rightarrow \mathbb{R}^N$  as  $(\Omega(\mathbf{A}))_k = \langle \mathbf{X}_k, \mathbf{A} \rangle$ .

*Proof of Theorem A.1.* Due to the basic inequality, we have

$$\begin{aligned} & \frac{1}{N} \sum_{k=1}^N \left( \widetilde{Y}_k^{(1)} - \operatorname{tr}(\mathbf{X}_k^T \widehat{\mathbf{A}}) \right)^2 + \lambda_N \left\| \widehat{\mathbf{A}} \right\|_* \leq \\ & \frac{1}{N} \sum_{k=1}^N \left( \widetilde{Y}_k^{(1)} - \operatorname{tr}(\mathbf{X}_k^T \mathbf{A}_*) \right)^2 + \lambda_N \left\| \mathbf{A}_* \right\|_*, \end{aligned}$$

which implies

$$\begin{aligned} & \frac{1}{N} \left\| \Omega \left( \mathbf{A}_* - \widehat{\mathbf{A}} \right) \right\|_F^2 + \lambda_N \left\| \widehat{\mathbf{A}} \right\|_* \\ & \leq 2 \left\langle \widehat{\mathbf{A}} - \mathbf{A}_*, \boldsymbol{\Sigma}^{(1)} \right\rangle + \lambda_N \left\| \mathbf{A}_* \right\|_* \\ & \leq 2 \left\| \boldsymbol{\Sigma}^{(1)} \right\| \left\| \widehat{\mathbf{A}} - \mathbf{A}_* \right\|_* + \lambda_N \left\| \mathbf{A}_* \right\|_*. \end{aligned}$$

Together with Lemma A.4 and follow the proof of Theorem 3 in Klopp (2014), it complete the proof.  $\square$

*Proof of Lemma 1.* Replacing the tuning parameter  $\lambda_N$  by  $\lambda_{N,t}$ , Lemma 1 follows directly from the proof of Lemma A.4.  $\square$

*Proof of Theorem 2.* Similar with the proof of Theorem A.1, together with the result in Lemma 1 we complete the proof.  $\square$

## B. Experiments (Cont')

### B.1. Synthetic Data (Cont')

In the following, we tested the proposed method DLADMC with the initial estimator synthetically generated by adding standard Gaussian noises ( $\mathcal{N}(0,1)$ ) to the ground truth matrix  $\mathbf{A}_*$  and reported all the results in Table S1.

Table S1. The average RMSEs, MAEs, estimated ranks and their standard errors (in parentheses) of modified DLADMC over 500 simulations. The number in the first column within the parentheses represents  $T$  in Algorithm 1.

| (T)   | RMSE            | MAE             | rank         |
|-------|-----------------|-----------------|--------------|
| S1(4) | 0.6364 (0.0238) | 0.4826 (0.0232) | 63.74 (5.37) |
| S2(5) | 0.8985 (0.0407) | 0.6738 (0.0404) | 67.59 (6.76) |
| S3(5) | 0.4460 (0.0080) | 0.3179 (0.0067) | 43.07 (6.00) |
| S4(4) | 0.8522 (0.0203) | 0.6229 (0.0210) | 45.21 (5.52) |

### B.2. Real-World Data (Cont')

#### B.2.1. EFFECT OF ITERATION NUMBER

To understand the effect of the iteration number, we ran 10 iterations and report all the details in Table S2. Briefly, the smallest and largest RMSEs among these iterations are (0.9226,0.9255), (0.9344,0.9381), (1.0486,1.0554) and (1.0512,1.0591) with respect to the 4 datasets in Section 4.2. Even with the worst RMSEs, we achieve a similar conclusion as shown in Section 4.2 of the paper.

Table S2. The RMSEs, MAEs and estimated ranks of DLADMC with different iteration number under dimensions  $n_1 = 739$  and  $n_2 = 918$ .

|      | t    | 1      | 2      | 3      | 4      | 5      |
|------|------|--------|--------|--------|--------|--------|
| RawA | RMSE | 0.9253 | 0.9253 | 0.9229 | 0.9252 | 0.9233 |
|      | MAE  | 0.7241 | 0.7267 | 0.7224 | 0.7264 | 0.7230 |
|      | rank | 54     | 50     | 53     | 45     | 59     |
| RawB | RMSE | 0.9368 | 0.9381 | 0.9344 | 0.9373 | 0.9363 |
|      | MAE  | 0.7315 | 0.7344 | 0.7291 | 0.7340 | 0.7310 |
|      | rank | 57     | 51     | 59     | 44     | 40     |
| OutA | RMSE | 1.0550 | 1.0543 | 1.0509 | 1.0549 | 1.0506 |
|      | MAE  | 0.8659 | 0.8648 | 0.8609 | 0.8673 | 0.8595 |
|      | rank | 28     | 35     | 48     | 29     | 33     |
| OutB | RMSE | 1.0591 | 1.0569 | 1.0532 | 1.0583 | 1.0527 |
|      | MAE  | 0.8707 | 0.8679 | 0.8632 | 0.8713 | 0.8627 |
|      | rank | 24     | 33     | 45     | 31     | 30     |
|      | t    | 6      | 7      | 8      | 9      | 10     |
| RawA | RMSE | 0.9253 | 0.9235 | 0.9250 | 0.9227 | 0.9255 |
|      | MAE  | 0.7265 | 0.7233 | 0.7264 | 0.7219 | 0.7268 |
|      | rank | 41     | 41     | 45     | 55     | 44     |
| RawB | RMSE | 0.9362 | 0.9352 | 0.9369 | 0.9345 | 0.9370 |
|      | MAE  | 0.7328 | 0.7300 | 0.7333 | 0.7292 | 0.7339 |
|      | rank | 49     | 51     | 46     | 58     | 44     |
| OutA | RMSE | 1.0544 | 1.0486 | 1.0553 | 1.0491 | 1.0554 |
|      | MAE  | 0.8671 | 0.8568 | 0.8695 | 0.8569 | 0.8697 |
|      | rank | 31     | 38     | 35     | 40     | 33     |
| OutB | RMSE | 1.0572 | 1.0521 | 1.0577 | 1.0512 | 1.0582 |
|      | MAE  | 0.8699 | 0.8616 | 0.8706 | 0.8602 | 0.8716 |
|      | rank | 30     | 28     | 31     | 30     | 33     |

#### B.2.2. MOVIELENS-1M

To further demonstrate the scalability of our proposed method, we tested various methods on a larger MovieLens-

1M<sup>1</sup> dataset. This data set consists of 1,000,209 movie ratings provided by 6040 viewers on approximate 3900 movies. The ratings also range from 1 to 5. To evaluate the performance of different methods, we keep one fifth of the data to be test set and remaining to be training set. We refer it to as **Raw**. Similar to [Alquier et al. \(2019\)](#), we added artificial outliers by randomly changing 20% of ratings that are equal to 5 in the train set to 1 and constructed **Out**. To avoid rows and columns that contain too few observations, we only keep the rows and columns with at least 40 ratings. The resulting target matrix  $\mathbf{A}_*$  is of dimension  $4290 \times 2505$ . For the proposed **DLADMC**, we fix the iteration number to 10. For the proposed **BLADMC**, to faster the speed, we split the data matrix so that the number of row subsets  $l_1 = 4$  and number of column subsets  $l_2 = 3$ . To save times, the tuning parameters for all the methods were chosen by the one-fold validation. The RMSEs, MAEs, estimated ranks and the total computing time (in seconds) are reported in [Table 2](#). For a fair comparison, we recorded the time of each method in the experiment with the selected tuning parameter.

Klopp, O. Noisy low-rank matrix completion with general sampling distribution. *Bernoulli*, 20(1):282–303, 2014.

Table S3. The RMSEs, MAEs and estimated ranks of **DLADMC**, **BLADMC**, **ACL** and **MHT** under dimensions  $n_1 = 4290$  and  $n_2 = 2505$ .

|     |      | DLADMC   | BLADMC  | MHT     |
|-----|------|----------|---------|---------|
| Raw | RMSE | 0.8632   | 0.9733  | 0.8520  |
|     | MAE  | 0.6768   | 0.7865  | 0.6680  |
|     | rank | 111      | 1911    | 156     |
|     | $t$  | 19593.58 | 1203.45 | 2113.55 |
| Out | RMSE | 0.9161   | 0.9733  | 0.9757  |
|     | MAE  | 0.7331   | 0.7865  | 0.8021  |
|     | rank | 125      | 1913    | 45      |
|     | $t$  | 14290.16 | 1076.69 | 1053.58 |

As **ACL** is not scalable to large dimensions, we could not obtain the results of **ACL** within five times of the running time of the proposed **DLADMC**. It is noted that under the raw data **Raw**, the proposed **DLADMC** performed similarly as the least squares estimator **MHT**. **BLADMC** lost some efficiency due to the embarrassingly parallel computing. For the dataset with outliers, the proposed **DLADMC** performed better than **MHT**.

## References

Alquier, P., Cottet, V., and Lecué, G. Estimation bounds and sharp oracle inequalities of regularized procedures with lipschitz loss functions. *The Annals of Statistics*, 47(4):2117–2144, 2019.

Cai, T. T. and Liu, W. Adaptive thresholding for sparse covariance matrix estimation. *Journal of the American Statistical Association*, 106(494):672–684, 2011.

<sup>1</sup><https://grouplens.org/datasets/movielens/1m/>
